## COMMENTS AND RESPONSES

### **Comment on: Alssema et al. One Risk Assessment Tool for Cardiovascular Disease, Type 2 Diabetes, and Chronic Kidney Disease. Diabetes Care 2012; 35: 741-748**

**A**lssema et al. (1) recently reported a novel prediction score for cardiometabolic risk among white European adults. Unlike the many available validated models that separately predict cardiovascular disease, type 2 diabetes, or chronic kidney disease, their model predicts the occurrence of any of these three outcomes. This approach acknowledges one of the challenges faced by all primary care providers: how to screen for the risk for multiple conditions in a time-limited setting (2). Moreover, because the authors included only predictors that can be self-reported, such as family history, smoking status, and BMI, this model may

have utility in population-based screening outside of the clinical setting.

The authors correctly point out that the next step in applying this model to risk identification at the individual or public health level will be its validation in other cohorts. As with any prediction model, it will be important to assess whether the performance of this model, in terms of its sensitivity and specificity, might be optimistically overestimated in the cohort in which it was derived. I also recommend that the authors validate their model in a longitudinal cohort using a time-to-event analysis such as Cox regression instead of logistic regression (3). In the analyses by Alssema et al. in the Rotterdam, Hoorn, and Prevention of Renal and Vascular End-stage Disease (PREVEND) studies, about 22% of eligible study participants did not have follow-up information on the outcomes of interest. It is unknown whether this loss to follow-up introduced bias to the study's results. A longitudinal study with multiple serial assessments for the outcomes would allow such losses to follow-up to contribute some person-time to the analyses. In this way, model performance would be less biased, even with the same cumulative loss to follow-up.

If other studies, including those in other race/ethnic groups, validate this work, it might be a useful first step in screening for cardiometabolic disease in the primary care setting, where getting a three-for-one deal on preventive care would be a welcome occurrence.

JASON L. VASSY, MD, MPH, SM

From the Section of General Internal Medicine, Department of Medicine, VA Boston Healthcare System, Boston, Massachusetts; the Division of General Internal Medicine and Primary Care, Department of Medicine, Brigham and Women's Hospital, Boston, Massachusetts; and the Department of Medicine, Harvard Medical School, Boston, Massachusetts.

Corresponding author: Jason L. Vassy, [jvassy@partners.org](mailto:jvassy@partners.org).

DOI: 10.2337/dc12-0566

© 2012 by the American Diabetes Association. Readers may use this article as long as the work is properly cited, the use is educational and not for profit, and the work is not altered. See <http://creativecommons.org/licenses/by-nc-nd/3.0/> for details.

**Acknowledgments**—No potential conflicts of interest relevant to this article were reported.

#### References

1. Alssema M, Newson RS, Bakker SJL, et al. One risk assessment tool for cardiovascular disease, type 2 diabetes, and chronic kidney disease. *Diabetes Care* 2012;35:741-748
2. Yarnall KS, Pollak KI, Østbye T, Krause KM, Michener JL. Primary care: is there enough time for prevention? *Am J Public Health* 2003;93:635-641
3. Pencina MJ, D'Agostino RB. Overall C as a measure of discrimination in survival analysis: model specific population value and confidence interval estimation. *Stat Med* 2004;23:2109-2123
